# Supplementary material for: Characterization of structural changes in modern and archaeological burnt bone: Implications for differential preservation bias
Source: PubMed Central journal article supplement (PMC8318310; doi:10.1371/journal.pone.0254529), 2021-07-28
Supplement: pone.0254529.s002.pdf [file pone.0254529.s002.pdf]

S1 Table: Experimental modern bone FTIR-ATR relevant peak height values.

| Sample                 | Species | Temperature (°C) | 1650 cm <sup>-1</sup> | 1415 cm <sup>-1</sup> | 1035 cm <sup>-1</sup> | 874 cm <sup>-1</sup> | 625 cm <sup>-1</sup> | 605 cm <sup>-1</sup> | 595 cm <sup>-1</sup> | 565 cm <sup>-1</sup> |
|------------------------|---------|------------------|-----------------------|-----------------------|-----------------------|----------------------|----------------------|----------------------|----------------------|----------------------|
| UCDX4_1505_unburnt_1.1 | Cow     | 25               | 0.027                 | 0.031                 | 0.11                  | 0.041                | 0.039                | 0.083                | 0.077                | 0.117                |
| UCDX4_1505_unburnt_1.2 |         | 25               | 0.0211                | 0.025                 | 0.0885                | 0.0323               | 0.0338               | 0.071                | 0.0626               | 0.0969               |
| UCDX4_1500_unburnt_1.1 | Cow     | 25               | 0.037                 | 0.042                 | 0.128                 | 0.05                 | 0.052                | 0.01                 | 0.091                | 0.139                |
| UCDX4_1500_unburnt_1.2 |         | 25               | 0.037                 | 0.037                 | 0.115                 | 0.044                | 0.049                | 0.091                | 0.082                | 0.122                |
| UCDX4_1501_unburnt_1.1 | Cow     | 25               | 0.005                 | 0.018                 | 0.137                 | 0.026                | 0.031                | 0.081                | 0.07                 | 0.13                 |
| UCDX4_1501_unburnt_1.2 |         | 25               | 0.004                 | 0.019                 | 0.132                 | 0.026                | 0.032                | 0.077                | 0.068                | 0.126                |
| UCDX4_2120_unburnt_1.1 | Cow     | 25               | 0.042                 | 0.05                  | 0.132                 | 0.052                | 0.053                | 0.105                | 0.098                | 0.14                 |
| UCDX4_2120_unburnt_1.2 |         | 25               | 0.041                 | 0.049                 | 0.132                 | 0.052                | 0.059                | 0.099                | 0.093                | 0.129                |
| UCDX4_4101_unburnt_1.1 | Horse   | 25               | 0.041                 | 0.05                  | 0.141                 | 0.052                | 0.057                | 0.108                | 0.099                | 0.144                |
| UCDX4_4101_unburnt_1.2 |         | 25               | 0.041                 | 0.051                 | 0.136                 | 0.051                | 0.053                | 0.104                | 0.095                | 0.141                |
| UCDX4_1505_100_30_1.1  | Cow     | 100              | 0.0088                | 0.012                 | 0.0403                | 0.0213               | 0.0177               | 0.0377               | 0.0352               | 0.0531               |
| UCDX4_1505_100_30_1.2  |         | 100              | 0.0134                | 0.0165                | 0.0449                | 0.0247               | 0.0216               | 0.0413               | 0.038                | 0.0571               |
| UCDX4_H1_100_30_1.1    | Horse   | 100              | 0.0115                | 0.0147                | 0.033                 | 0.0187               | 0.0174               | 0.0291               | 0.0273               | 0.0377               |
| UCDX4_H1_100_30_1.2    |         | 100              | 0.02                  | 0.0154                | 0.0314                | 0.0194               | 0.017                | 0.0275               | 0.0262               | 0.0359               |
| UCDX4_1505_200_30_1.1  | Cow     | 200              | 0.007                 | 0.0097                | 0.0309                | 0.0164               | 0.0134               | 0.0273               | 0.0259               | 0.0414               |
| UCDX4_1505_200_30_1.2  |         | 200              | 0.0019                | 0.0044                | 0.0271                | 0.0106               | 0.0079               | 0.024                | 0.0217               | 0.0368               |
| UCDX4_H1_200_30_1.1    | Horse   | 200              | 0.0164                | 0.0209                | 0.0563                | 0.0269               | 0.025                | 0.0483               | 0.0447               | 0.0652               |
| UCDX4_H1_200_30_1.2    |         | 200              | 0.0151                | 0.0189                | 0.0487                | 0.0238               | 0.0248               | 0.044                | 0.0409               | 0.0597               |
| UCDX4_H2_200_30_1.1    | Horse   | 200              | 0.0223                | 0.0277                | 0.0759                | 0.0325               | 0.03                 | 0.0633               | 0.0577               | 0.0886               |
| UCDX4_H2_200_30_1.2    |         | 200              | 0.0219                | 0.0271                | 0.0717                | 0.0308               | 0.0332               | 0.0586               | 0.0524               | 0.0802               |
| UCDX4_1505_300_30_1.1  | Cow     | 300              | 0.014                 | 0.027                 | 0.106                 | 0.034                | 0.034                | 0.074                | 0.064                | 0.106                |
| UCDX4_1505_300_30_1.2  |         | 300              | 0.0001                | 0.0055                | 0.0421                | 0.0084               | 0.0108               | 0.0312               | 0.0251               | 0.0469               |
| UCDX4_1500_300_30_1.1  | Cow     | 300              | 0.017                 | 0.032                 | 0.154                 | 0.035                | 0.049                | 0.103                | 0.088                | 0.148                |
| UCDX4_1500_300_30_1.2  |         | 300              | 0.019                 | 0.037                 | 0.184                 | 0.043                | 0.057                | 0.12                 | 0.101                | 0.18                 |
| UCDX4_H1_300_30_1.1    | Horse   | 300              | 0.016                 | 0.031                 | 0.113                 | 0.031                | 0.032                | 0.08                 | 0.069                | 0.111                |
| UCDX4_H1_300_30_1.2    |         | 300              | 0.022                 | 0.042                 | 0.151                 | 0.038                | 0.053                | 0.101                | 0.087                | 0.135                |
| UCDX4_H2_300_30_1.1    | Horse   | 300              | 0.025                 | 0.042                 | 0.151                 | 0.041                | 0.047                | 0.1                  | 0.087                | 0.14                 |
| UCDX4_H2_300_30_1.2    |         | 300              | 0.019                 | 0.033                 | 0.121                 | 0.032                | 0.035                | 0.081                | 0.07                 | 0.113                |
| UCDX4_H2T2_300_30_1.1  | Horse   | 300              | 0.024                 | 0.041                 | 0.14                  | 0.037                | 0.038                | 0.096                | 0.08                 | 0.139                |
| UCDX4_H2T2_300_30_1.2  |         | 300              | 0.027                 | 0.047                 | 0.17                  | 0.042                | 0.04                 | 0.109                | 0.091                | 0.154                |

|                          |       |     |         |        |        |        |        |        |        |        |
|--------------------------|-------|-----|---------|--------|--------|--------|--------|--------|--------|--------|
| UCDX4_1505_300_30x30_1.1 | Cow   | 300 | 0.009   | 0.023  | 0.111  | 0.032  | 0.031  | 0.078  | 0.068  | 0.122  |
| UCDX4_1505_300_30x30_1.2 |       | 300 | 0.009   | 0.021  | 0.101  | 0.03   | 0.03   | 0.069  | 0.061  | 0.103  |
| UCDX4_H1_300_30x30_1.1   | Horse | 300 | 0.015   | 0.032  | 0.152  | 0.033  | 0.039  | 0.103  | 0.085  | 0.148  |
| UCDX4_H1_300_30x30_1.2   |       | 300 | 0.017   | 0.037  | 0.157  | 0.036  | 0.048  | 0.0106 | 0.089  | 0.15   |
| UCDX4_H1T2_300_30x30_1.1 | Horse | 300 | 0.02    | 0.041  | 0.159  | 0.042  | 0.046  | 0.106  | 0.091  | 0.156  |
| UCDX4_H1T2_300_30x30_1.2 |       | 300 | 0.022   | 0.046  | 0.184  | 0.046  | 0.048  | 0.121  | 0.102  | 0.133  |
| UCDX4_H1_300_50_1.1      | Horse | 300 | 0.0125  | 0.026  | 0.0971 | 0.0299 | 0.0373 | 0.0639 | 0.0605 | 0.0988 |
| UCDX4_H1_300_50_1.2      |       | 300 | 0.021   | 0.041  | 0.149  | 0.042  | 0.054  | 0.093  | 0.084  | 0.136  |
| UCDX4_H2_300_50_1.1      | Horse | 300 | 0.025   | 0.053  | 0.223  | 0.045  | 0.059  | 0.129  | 0.114  | 0.205  |
| UCDX4_H2_300_50_1.2      |       | 300 | 0.024   | 0.05   | 0.221  | 0.042  | 0.064  | 0.134  | 0.112  | 0.203  |
| UCDX4_1505_400_30_1.1    | Cow   | 400 | 0.004   | 0.019  | 0.12   | 0.027  | 0.03   | 0.076  | 0.067  | 0.123  |
| UCDX4_1505_400_30_1.2    |       | 400 | 0.008   | 0.022  | 0.114  | 0.03   | 0.033  | 0.079  | 0.066  | 0.119  |
| UCDX4_1500_400_30_1.1    | Cow   | 400 | 0.019   | 0.039  | 0.213  | 0.014  | 0.052  | 0.13   | 0.11   | 0.191  |
| UCDX4_1500_400_30_1.2    |       | 400 | 0.016   | 0.036  | 0.204  | 0.014  | 0.062  | 0.126  | 0.106  | 0.194  |
| UCDX4_1501_400_30_1.1    | Cow   | 400 | 0.011   | 0.024  | 0.114  | 0.032  | 0.035  | 0.075  | 0.069  | 0.12   |
| UCDX4_1501_400_30_1.2    |       | 400 | 0.012   | 0.026  | 0.117  | 0.033  | 0.038  | 0.076  | 0.071  | 0.119  |
| UCDX4_H1_400_30_1.1      | Horse | 400 | 0.011   | 0.034  | 0.161  | 0.035  | 0.038  | 0.098  | 0.084  | 0.152  |
| UCDX4_H1_400_30_1.2      |       | 400 | 0.011   | 0.035  | 0.159  | 0.035  | 0.036  | 0.095  | 0.085  | 0.153  |
| UCDX4_H2_400_30_1.1      | Horse | 400 | 0.02    | 0.049  | 0.214  | 0.043  | 0.054  | 0.125  | 0.102  | 0.192  |
| UCDX4_H2_400_30_1.2      |       | 400 | 0.018   | 0.039  | 0.15   | 0.036  | 0.04   | 0.096  | 0.143  | 0.08   |
| UCDX4_1505_500_30_1.1    | Cow   | 500 | 0.0066  | 0.018  | 0.114  | 0.023  | 0.028  | 0.07   | 0.056  | 0.106  |
| UCDX4_1505_500_30_1.2    |       | 500 | 0.006   | 0.016  | 0.101  | 0.03   | 0.033  | 0.075  | 0.063  | 0.118  |
| UCDX4_1500_500_30_1.1    | Cow   | 500 | 0.015   | 0.033  | 0.192  | 0.042  | 0.047  | 0.119  | 0.098  | 0.183  |
| UCDX4_1500_500_30_1.2    |       | 500 | 0.011   | 0.029  | 0.166  | 0.036  | 0.052  | 0.11   | 0.088  | 0.161  |
| UCDX4_H1_500_30_1.1      | Horse | 500 | 0.0104  | 0.0232 | 0.09   | 0.0252 | 0.0319 | 0.0648 | 0.0537 | 0.0929 |
| UCDX4_H1_500_30_1.2      |       | 500 | 0.0107  | 0.024  | 0.0926 | 0.0277 | 0.0298 | 0.0639 | 0.0537 | 0.0904 |
| UCDX4_H2_500_30_1.1      | Horse | 500 | 0.009   | 0.035  | 0.172  | 0.033  | 0.043  | 0.108  | 0.088  | 0.158  |
| UCDX4_H2_500_30_1.2      |       | 500 | 0.009   | 0.034  | 0.158  | 0.032  | 0.035  | 0.102  | 0.083  | 0.149  |
| UCDX4_1505_600_30_1.1    | Cow   | 600 | -0.0022 | 0.0045 | 0.0767 | 0.0102 | 0.0163 | 0.0539 | 0.0381 | 0.0811 |
| UCDX4_1505_600_30_1.2    |       | 600 | 0       | 0.009  | 0.103  | 0.016  | 0.022  | 0.069  | 0.051  | 0.107  |
| UCDX4_1500_600_30_1.1    | Cow   | 600 | 0.009   | 0.021  | 0.185  | 0.023  | 0.048  | 0.106  | 0.78   | 0.165  |

|                          |       |       |        |        |        |        |        |        |        |        |
|--------------------------|-------|-------|--------|--------|--------|--------|--------|--------|--------|--------|
| UCDX4_1500_600_30_1.2    | Cow   | 600   | 0.009  | 0.021  | 0.185  | 0.023  | 0.056  | 0.112  | 0.77   | 0.165  |
| UCDX4_1501_600_30_1.1    | Cow   | 600   | 0.009  | 0.021  | 0.145  | 0.029  | 0.037  | 0.09   | 0.072  | 0.142  |
| UCDX4_1501_600_30_1.2    |       | 600   | 0.0034 | 0.0139 | 0.0995 | 0.0182 | 0.0263 | 0.0617 | 0.0482 | 0.095  |
| UCDX4_H1_600_30_1.1      | Horse | 600   | 0.013  | 0.028  | 0.122  | 0.032  | 0.04   | 0.085  | 0.065  | 0.119  |
| UCDX4_H1_600_30_1.2      |       | 600   | 0.012  | 0.025  | 0.108  | 0.028  | 0.033  | 0.077  | 0.058  | 0.108  |
| UCDX4_H2_600_30_1.1      | Horse | 600   | 0.006  | 0.032  | 0.193  | 0.034  | 0.04   | 0.112  | 0.083  | 0.176  |
| UCDX4_H2_600_30_1.2      |       | 600   | 0.008  | 0.036  | 0.193  | 0.036  | 0.043  | 0.116  | 0.088  | 0.18   |
| UCDX4_H4_600_30_1.1      | Horse | 600   | 0.01   | 0.025  | 0.143  | 0.027  | 0.031  | 0.085  | 0.061  | 0.125  |
| UCDX4_H4_600_30_1.2      |       | 600   | 0.011  | 0.03   | 0.152  | 0.03   | 0.036  | 0.089  | 0.68   | 0.133  |
| UCDX4_1505_700_30_1.1    | Cow   | 700   | 0      | 0.005  | 0.098  | 0.013  | 0.021  | 0.061  | 0.044  | 0.097  |
| UCDX4_1505_700_30_1.2    |       | 700   | 0.0018 | 0.0057 | 0.0705 | 0.0112 | 0.0177 | 0.051  | 0.0335 | 0.0726 |
| UCDX4_1500_700_30_1.1    | Cow   | 700   | 0.011  | 0.026  | 0.318  | 0.031  | 0.061  | 0.166  | 0.108  | 0.242  |
| UCDX4_1500_700_30_1.2    |       | 700   | 0.012  | 0.025  | 0.0292 | 0.03   | 0.056  | 0.154  | 0.108  | 0.242  |
| UCDX4_1501_700_30_1.1    | Cow   | 700   | 0.005  | 0.013  | 0.164  | 0.02   | 0.035  | 0.095  | 0.071  | 0.148  |
| UCDX4_1501_700_30_1.2    |       | 700   | 0.004  | 0.012  | 0.153  | 0.019  | 0.034  | 0.091  | 0.068  | 0.139  |
| UCDX4_H1_700_30_1.1      | Horse | 700   | 0.007  | 0.046  | 0.423  | 0.042  | 0.058  | 0.242  | 0.136  | 0.329  |
| UCDX4_H1T1_700_30_1.1    |       | 700   | 0.009  | 0.049  | 0.0468 | 0.047  | 0.062  | 0.236  | 0.139  | 0.344  |
| UCDX4_H1T1_700_30_1.2    | Horse | 700   | 0.01   | 0.048  | 0.0384 | 0.04   | 0.061  | 0.22   | 0.128  | 0.307  |
| UCDX4_H2_700_30_1.1      |       | 700   | 0.013  | 0.048  | 0.34   | 0.042  | 0.048  | 0.177  | 0.121  | 0.269  |
| UCDX4_H2_700_30_1.2      | Horse | 700   | 0.014  | 0.051  | 0.298  | 0.042  | 0.047  | 0.158  | 0.112  | 0.237  |
| UCDX4_1505_700_30x30_1.1 |       | 700   | 0.004  | 0.01   | 0.153  | 0.02   | 0.037  | 0.099  | 0.063  | 0.145  |
| UCDX4_1505_700_30x30_1.2 | Cow   | 700   | 0.004  | 0.01   | 0.126  | 0.018  | 0.032  | 0.082  | 0.054  | 0.121  |
| UCDX4_1501_700_30x30_1.1 |       | 700   | 0.006  | 0.016  | 0.233  | 0.023  | 0.052  | 0.142  | 0.084  | 0.142  |
| UCDX4_1501_700_30x30_1.2 | Cow   | 700   | 0.006  | 0.017  | 0.214  | 0.022  | 0.05   | 0.134  | 0.08   | 0.134  |
| UCDX4_H0_700_30x30_1.1   |       | 700   | 0.011  | 0.044  | 0.4    | 0.038  | 0.062  | 0.213  | 0.124  | 0.319  |
| UCDX4_H0_700_30x30_1.2   | Horse | 700   | 0.012  | 0.047  | 0.41   | 0.041  | 0.066  | 0.223  | 0.138  | 0.334  |
| UCDX4_H1_700_30x30_1.1   |       | 700   | 0.011  | 0.045  | 0.426  | 0.048  | 0.065  | 0.23   | 0.136  | 0.344  |
| UCDX4_H1_700_30x30_1.2   | Horse | 700   | 0.013  | 0.042  | 0.333  | 0.044  | 0.058  | 0.196  | 0.12   | 0.277  |
| UCDX4_H2_700_30x30_1.1   |       | 700   | 0.006  | 0.048  | 0.441  | 0.042  | 0.059  | 0.209  | 0.148  | 0.357  |
| UCDX4_H2_700_30x30_1.2   | Horse | 700   | 0.008  | 0.049  | 0.448  | 0.043  | 0.06   | 0.237  | 0.149  | 0.359  |
| UCDX4_H3_700_30x30_1.1   |       | Horse | 700    | 0.01   | 0.05   | 0.532  | 0.044  | 0.079  | 0.0263 | 0.151  |

|                        |       |      |          |         |        |        |        |        |        |        |
|------------------------|-------|------|----------|---------|--------|--------|--------|--------|--------|--------|
| UCDX4_H3_700_30x30_1.2 | Horse | 700  | 0.01     | 0.048   | 0.441  | 0.048  | 0.072  | 0.0246 | 0.141  | 0.346  |
| UCDX4_H1_700_50_1.1    | Horse | 700  | 0.01     | 0.049   | 0.443  | 0.044  | 0.059  | 0.233  | 0.14   | 0.336  |
| UCDX4_H1_700_50_1.2    |       | 700  | 0.007    | 0.04    | 0.293  | 0.036  | 0.048  | 0.18   | 0.111  | 0.248  |
| UCDX4_1505_800_30_1.1  | Cow   | 800  | 0.004    | 0.01    | 0.157  | 0.02   | 0.044  | 0.103  | 0.07   | 0.147  |
| UCDX4_1505_800_30_1.2  |       | 800  | 0.004    | 0.01    | 0.157  | 0.02   | 0.033  | 0.103  | 0.07   | 0.147  |
| UCDX4_1501_800_30_1.1  | Cow   | 800  | 0.009    | 0.019   | 0.23   | 0.029  | 0.052  | 0.135  | 0.093  | 0.21   |
| UCDX4_1501_800_30_1.2  |       | 800  | 0.009    | 0.017   | 0.208  | 0.027  | 0.048  | 0.124  | 0.083  | 0.194  |
| UCDX4_H1_800_30_1.1    | Horse | 800  | 0.012    | 0.042   | 0.448  | 0.041  | 0.068  | 0.24   | 0.146  | 0.369  |
| UCDX4_H1_800_30_1.2    |       | 800  | 0.012    | 0.039   | 0.398  | 0.039  | 0.063  | 0.222  | 0.14   | 0.328  |
| UCDX4_1505_900_30_1.1  | Cow   | 900  | 0.003    | 0.006   | 0.258  | 0.018  | 0.048  | 0.163  | 0.1    | 0.242  |
| UCDX4_1505_900_30_1.2  |       | 900  | 0.005    | 0.008   | 0.277  | 0.022  | 0.051  | 0.161  | 0.106  | 0.26   |
| UCDX4_1500_900_30_1.1  | Cow   | 900  | 0.011    | 0.013   | 0.466  | 0.021  | 0.119  | 0.259  | 0.138  | 0.395  |
| UCDX4_1500_900_30_1.2  |       | 900  | 0.01     | 0.013   | 0.406  | 0.018  | 0.106  | 0.239  | 0.137  | 0.354  |
| UCDX4_H1_900_30_1.1    | Horse | 900  | 0.007    | 0.026   | 0.446  | 0.033  | 0.066  | 0.152  | 0.152  | 0.378  |
| UCDX4_H1_900_30_1.2    |       | 900  | 0.011    | 0.029   | 0.467  | 0.036  | 0.068  | 0.156  | 0.156  | 0.385  |
| UCDX4_H5_900_30_1.1    | Horse | 900  | 0.007    | 0.031   | 0.562  | 0.041  | 0.064  | 0.0283 | 0.177  | 0.439  |
| UCDX4_H5_900_30_1.2    |       | 900  | 0.006    | 0.028   | 0.515  | 0.039  | 0.061  | 0.0267 | 0.125  | 0.408  |
| UCDX4_1505_1000_30_1.1 | Cow   | 1000 | 0.0002   | 0.001   | 0.119  | 0.02   | 0.024  | 0.095  | 0.066  | 0.135  |
| UCDX4_1505_1000_30_1.2 |       | 1000 | -0.0013  | 0       | 0.101  | 0.018  | 0.019  | 0.082  | 0.56   | 0.12   |
| UCDX4_1500_1000_30_1.1 | Cow   | 1000 | 0        | 0.013   | 0.105  | 0.017  | 0.061  | 0.116  | 0.063  | 0.159  |
| UCDX4_1500_1000_30_1.2 |       | 1000 | 0.016    | 0.016   | 0.279  | 0.024  | 0.096  | 0.188  | 0.101  | 0.271  |
| UCDX4_1501_1000_30_1.1 | Cow   | 1000 | 0.005    | 0.018   | 0.137  | 0.026  | 0.033  | 0.086  | 0.068  | 0.136  |
| UCDX4_1501_1000_30_1.2 |       | 1000 | 0.004    | 0.019   | 0.133  | 0.026  | 0.032  | 0.084  | 0.067  | 0.126  |
| UCDX4_H0_1000_30_1.1   | Horse | 1000 | 0.012    | 0.013   | 0.313  | 0.024  | 0.049  | 0.188  | 0.127  | 0.288  |
| UCDX4_H0_1000_30_1.2   |       | 1000 | 0.014    | 0.015   | 0.372  | 0.029  | 0.057  | 0.223  | 0.148  | 0.33   |
| UCDX4_H1_1000_30_1.1   | Horse | 1000 | 0.004    | 0.007   | 0.362  | 0.023  | 0.052  | 0.215  | 0.144  | 0.336  |
| UCDX4_H1_1000_30_1.2   |       | 1000 | 0.006    | 0.008   | 0.316  | 0.021  | 0.048  | 0.205  | 0.133  | 0.295  |
| UCDX4_1505_1100_30_1.1 | Cow   | 1100 | -0.00249 | -0.018  | 0.0612 | 0.0212 | 0.0093 | 0.0587 | 0.0463 | 0.0801 |
| UCDX4_1505_1100_30_1.2 |       | 1100 | -0.00249 | -0.0019 | 0.0624 | 0.0176 | 0.0095 | 0.06   | 0.0476 | 0.081  |
| UCDX4_1500_1100_30_1.1 | Cow   | 1100 | 0.006    | 0.006   | 0.244  | 0.031  | 0.043  | 0.171  | 0.129  | 0.235  |
| UCDX4_1500_1100_30_1.2 |       | 1100 | 0.007    | 0.008   | 0.288  | 0.034  | 0.045  | 0.196  | 0.162  | 0.285  |

|                        |       |      |         |         |        |        |        |        |        |        |
|------------------------|-------|------|---------|---------|--------|--------|--------|--------|--------|--------|
| UCDX4_H1_1100_30_1.1   | Horse | 1100 | 0.014   | 0.016   | 0.303  | 0.038  | 0.048  | 0.195  | 0.148  | 0.277  |
| UCDX4_H1_1100_30_1.2   |       | 1100 | 0.013   | 0.015   | 0.274  | 0.024  | 0.06   | 0.191  | 0.148  | 0.258  |
| UCDX4_1505_1200_30_1.1 | Cow   | 1200 | -0.0039 | -0.0033 | 0.0498 | 0.0249 | 0.0079 | 0.0373 | 0.0441 | 0.0654 |
| UCDX4_1505_1200_30_1.2 |       | 1200 | -0.002  | -0.0017 | 0.0586 | 0.0288 | 0.0101 | 0.0559 | 0.0503 | 0.0734 |
| UCDX4_1500_1200_30_1.1 | Cow   | 1200 | 0.013   | 0.011   | 0.0249 | 0.045  | 0.05   | 0.183  | 0.162  | 0.247  |
| UCDX4_1500_1200_30_1.2 |       | 1200 | 0       | 0.011   | 0.209  | 0.047  | 0.04   | 0.162  | 0.142  | 0.211  |
| UCDX4_1501_1200_30_1.1 | Cow   | 1200 | 0.0063  | 0.061   | 0.046  | 0.0268 | 0.0152 | 0.0455 | 0.0424 | 0.0604 |
| UCDX4_1501_1200_30_1.2 |       | 1200 | 0.0078  | 0.077   | 0.053  | 0.0306 | 0.0193 | 0.0499 | 0.0455 | 0.0641 |
| UCDX4_H1_1200_30_1.1   | Horse | 1200 | 0.0108  | 0.0109  | 0.0384 | 0.0222 | 0.0228 | 0.0383 | 0.0359 | 0.0502 |
| UCDX4_H1_1200_30_1.2   |       | 1200 | 0.011   | 0.011   | 0.0549 | 0.0286 | 0.0233 | 0.0502 | 0.0454 | 0.067  |
| UCDX4_H2_1200_30_1.1   | Horse | 1200 | 0.015   | 0.016   | 0.157  | 0.048  | 0.057  | 0.116  | 0.108  | 0.173  |
| UCDX4_H2_1200_30_1.2   |       | 1200 | 0.016   | 0.017   | 0.158  | 0.048  | 0.045  | 0.121  | 0.112  | 0.176  |
