# Supplementary material for: Characterization of structural changes in modern and archaeological burnt bone: Implications for differential preservation bias
Source: PubMed Central journal article supplement (PMC8318310; doi:10.1371/journal.pone.0254529), 2021-07-28
Supplement: pone.0254529.s003.pdf [file pone.0254529.s003.pdf]

S2 Table: Calculated experimental modern sample values of FTIR C/P, IRSF, and bioapatite crystallite size as measured from XRD.

| Experimental Sample      | Species | Temperature<br>(°C) | FTIR-ATR                                           |                                                                        | XRD              |     |
|--------------------------|---------|---------------------|----------------------------------------------------|------------------------------------------------------------------------|------------------|-----|
|                          |         |                     | C/P                                                | SF                                                                     | Crystallite size |     |
|                          |         |                     | (1415 cm <sup>-1</sup><br>/1035 cm <sup>-1</sup> ) | (565 cm <sup>-1</sup> +605 cm <sup>-1</sup> )/<br>590 cm <sup>-1</sup> | Angstrom         | +/- |
| UCDX4_1505_unburnt_1.1   | Cow     | 25                  | 0.281                                              | 2.59                                                                   | 88               | 6   |
| UCDX4_1505_unburnt_1.2   |         | 25                  | 0.282                                              | 2.68                                                                   |                  |     |
| UCDX4_1500_unburnt_1.1   | Cow     | 25                  | 0.328                                              | 2.62                                                                   | 88               | 5   |
| UCDX4_1500_unburnt_1.2   |         | 25                  | 0.321                                              | 2.59                                                                   |                  |     |
| UCDX4_1501_unburnt_1.1   | Cow     | 25                  | 0.131                                              | 3.01                                                                   | 79               | 8   |
| UCDX4_1501_unburnt_1.2   |         | 25                  | 0.143                                              | 2.98                                                                   |                  |     |
| UCDX4_2120_unburnt_1.1   | Cow     | 25                  | 0.378                                              | 2.5                                                                    | 76               | 18  |
| UCDX4_2120_unburnt_1.2   |         | 25                  | 0.388                                              | 2.45                                                                   |                  |     |
| UCDX4_4101_unburnt_1.1   | Horse   | 25                  | 0.354                                              | 2.54                                                                   | 90               | 5   |
| UCDX4_4101_unburnt_1.2   |         | 25                  | 0.375                                              | 2.57                                                                   |                  |     |
| UCDX4_1505_100_30_1.1    | Cow     | 100                 | 0.297                                              | 2.57                                                                   | 80               | 5   |
| UCDX4_1505_100_30_1.2    |         | 100                 | 0.0367                                             | 2.58                                                                   |                  |     |
| UCDX4_H1_100_30_1.1      | Horse   | 100                 | 0.445                                              | 2.43                                                                   | 79               | 8   |
| UCDX4_H1_100_30_1.2      |         | 100                 | 0.49                                               | 2.41                                                                   |                  |     |
| UCDX4_1505_200_30_1.1    | Cow     | 200                 | 0.313                                              | 2.65                                                                   | 76               | 18  |
| UCDX4_1505_200_30_1.2    |         | 200                 | 0.162                                              | 2.8                                                                    |                  |     |
| UCDX4_H1_200_30_1.1      | Horse   | 200                 | 0.371                                              | 2.53                                                                   | 90               | 5   |
| UCDX4_H1_200_30_1.2      |         | 200                 | 0.388                                              | 2.53                                                                   |                  |     |
| UCDX4_H2_200_30_1.1      | Horse   | 200                 | 0.364                                              | 2.63                                                                   | 114              | 8   |
| UCDX4_H2_200_30_1.2      |         | 200                 | 0.377                                              | 2.64                                                                   |                  |     |
| UCDX4_1505_300_30_1.1    | Cow     | 300                 | 0.254                                              | 2.81                                                                   | 76               | 18  |
| UCDX4_1505_300_30_1.2    |         | 300                 | 0.13                                               | 3.11                                                                   |                  |     |
| UCDX4_1500_300_30_1.1    | Cow     | 300                 | 0.207                                              | 2.85                                                                   | 88               | 5   |
| UCDX4_1500_300_30_1.2    |         | 300                 | 0.201                                              | 2.97                                                                   |                  |     |
| UCDX4_H1_300_30_1.1      | Horse   | 300                 | 0.274                                              | 2.76                                                                   | 87               | 5   |
| UCDX4_H1_300_30_1.2      |         | 300                 | 0.278                                              | 2.71                                                                   |                  |     |
| UCDX4_H2_300_30_1.1      | Horse   | 300                 | 0.278                                              |                                                                        | 98               | 6   |
| UCDX4_H2_300_30_1.2      |         | 300                 | 0.272                                              |                                                                        |                  |     |
| UCDX4_H2T2_300_30_1.1    | Horse   | 300                 | 0.28                                               | 2.93                                                                   | 98               | 7   |
| UCDX4_H2T2_300_30_1.2    |         | 300                 | 0.267                                              | 2.89                                                                   |                  |     |
| UCDX4_1505_300_30x30_1.1 | Cow     | 300                 | 0.207                                              | 2.94                                                                   | 83               | 6   |
| UCDX4_1505_300_30x30_1.2 |         | 300                 | 0.207                                              | 2.81                                                                   |                  |     |
| UCDX4_H1_300_30x30_1.1   | Horse   | 300                 | 0.21                                               | 2.95                                                                   | 84               | 6   |
| UCDX4_H1_300_30x30_1.2   |         | 300                 | 0.235                                              | 1.8                                                                    |                  |     |
| UCDX4_H1T2_300_30x30_1.1 | Horse   | 300                 | 0.257                                              | 2.87                                                                   | 104              | 9   |
| UCDX4_H1T2_300_30x30_1.2 |         | 300                 | 0.25                                               | 2.49                                                                   |                  |     |
| UCDX4_H1_300_50_1.1      | Horse   | 300                 | 0.267                                              | 2.68                                                                   | 90               | 6   |
| UCDX4_H1_300_50_1.2      |         | 300                 | 0.275                                              | 2.72                                                                   |                  |     |
| UCDX4_H2_300_50_1.1      | Horse   | 300                 | 0.237                                              | 2.92                                                                   | 90               | 6   |
| UCDX4_H2_300_50_1.2      |         | 300                 | 0.226                                              | 3                                                                      |                  |     |
| UCDX4_1505_400_30_1.1    | Cow     | 400                 | 0.158                                              | 2.97                                                                   | 83               | 6   |
| UCDX4_1505_400_30_1.2    |         | 400                 | 0.192                                              | 3                                                                      |                  |     |
| UCDX4_1500_400_30_1.1    | Cow     | 400                 | 0.183                                              | 2.92                                                                   | 88               | 7   |
| UCDX4_1500_400_30_1.2    |         | 400                 | 0.176                                              | 3.02                                                                   |                  |     |
| UCDX4_1501_400_30_1.1    | Cow     | 400                 | 0.21                                               | 2.82                                                                   | 87               | 3   |
| UCDX4_1501_400_30_1.2    |         | 400                 | 0.222                                              | 2.74                                                                   |                  |     |
| UCDX4_H1_400_30_1.1      | Horse   | 400                 | 0.211                                              | 2.97                                                                   | 90               | 6   |
| UCDX4_H1_400_30_1.2      |         | 400                 | 0.22                                               | 2.91                                                                   |                  |     |
| UCDX4_H2_400_30_1.1      | Horse   | 400                 | 0.226                                              | 3.1                                                                    | 87               | 5   |

|                          |       |     |       |      |     |    |
|--------------------------|-------|-----|-------|------|-----|----|
| UCDX4_H2_400_30_1.2      | Horse | 400 | 0.228 | 1.23 | 52  | 5  |
| UCDX4_1505_500_30_1.1    | Cow   | 500 | 0.158 | 3.14 | 90  | 6  |
| UCDX4_1505_500_30_1.2    |       | 500 | 0.157 | 3.06 |     |    |
| UCDX4_1500_500_30_1.1    | Cow   | 500 | 0.171 | 3.08 | 94  | 7  |
| UCDX4_1500_500_30_1.2    |       | 500 | 0.174 | 3.07 |     |    |
| UCDX4_H1_500_30_1.1      | Horse | 500 | 0.257 | 2.93 | 105 | 7  |
| UCDX4_H1_500_30_1.2      |       | 500 | 0.259 | 2.87 |     |    |
| UCDX4_H2_500_30_1.1      | Horse | 500 | 0.203 | 3.02 | 85  | 4  |
| UCDX4_H2_500_30_1.2      |       | 500 | 0.215 | 3.02 |     |    |
| UCDX4_1505_600_30_1.1    | Cow   | 600 | 0.058 | 3.54 | 99  | 6  |
| UCDX4_1505_600_30_1.2    |       | 600 | 0.157 | 3.45 |     |    |
| UCDX4_1500_600_30_1.1    | Cow   | 600 | 0.113 | 3.47 | 109 | 4  |
| UCDX4_1500_600_30_1.2    |       | 600 | 0.113 | 3.59 |     |    |
| UCDX4_1501_600_30_1.1    | Cow   | 600 | 0.144 | 3.2  | 107 | 7  |
| UCDX4_1501_600_30_1.2    |       | 600 | 0.139 | 3.25 |     |    |
| UCDX4_H1_600_30_1.1      | Horse | 600 | 0.229 | 3.13 | 109 | 7  |
| UCDX4_H1_600_30_1.2      |       | 600 | 0.231 | 3.18 |     |    |
| UCDX4_H2_600_30_1.1      | Horse | 600 | 0.165 | 3.46 | 99  | 13 |
| UCDX4_H2_600_30_1.2      |       | 600 | 0.186 | 3.36 |     |    |
| UCDX4_H4_600_30_1.1      | Horse | 600 | 0.174 | 3.44 | 92  | 6  |
| UCDX4_H4_600_30_1.2      |       | 600 | 0.197 | 3.26 |     |    |
| UCDX4_1505_700_30_1.1    | Cow   | 700 | 0.051 | 3.59 | 256 | 15 |
| UCDX4_1505_700_30_1.2    |       | 700 | 0.08  | 3.68 |     |    |
| UCDX4_1500_700_30_1.1    | Cow   | 700 | 0.081 | 3.77 | 177 | 40 |
| UCDX4_1500_700_30_1.2    |       | 700 | 0.085 | 3.66 |     |    |
| UCDX4_1501_700_30_1.1    | Cow   | 700 | 0.079 | 3.42 | 376 | 18 |
| UCDX4_1501_700_30_1.2    |       | 700 | 0.078 | 3.38 |     |    |
| UCDX4_H1_700_30_1.1      | Horse | 700 | 0.108 | 4.19 | 389 | 8  |
| UCDX4_H1T1_700_30_1.1    |       | 700 | 0.104 | 4.17 |     |    |
| UCDX4_H1T1_700_30_1.2    | Horse | 700 | 0.125 | 4.11 | 462 | 12 |
| UCDX4_H2_700_30_1.1      |       | 700 | 0.141 | 3.68 |     |    |
| UCDX4_H2_700_30_1.2      | Horse | 700 | 0.171 | 3.52 | 289 | 17 |
| UCDX4_1505_700_30x30_1.1 |       | 700 | 0.065 | 3.87 |     |    |
| UCDX4_1505_700_30x30_1.2 | Cow   | 700 | 0.079 | 3.75 | 272 | 21 |
| UCDX4_1501_700_30x30_1.1 |       | 700 | 0.068 | 4.1  |     |    |
| UCDX4_1501_700_30x30_1.2 | Cow   | 700 | 0.079 | 4.01 | 653 | 15 |
| UCDX4_H0_700_30x30_1.1   |       | 700 | 0.11  | 4.29 |     |    |
| UCDX4_H0_700_30x30_1.2   | Horse | 700 | 0.114 | 4.03 | 564 | 13 |
| UCDX4_H1_700_30x30_1.1   |       | 700 | 0.105 | 4.22 |     |    |
| UCDX4_H1_700_30x30_1.2   | Horse | 700 | 0.126 | 3.94 | 583 | 19 |
| UCDX4_H2_700_30x30_1.1   |       | 700 | 0.108 | 3.82 |     |    |
| UCDX4_H2_700_30x30_1.2   | Horse | 700 | 0.109 | 4    | 583 | 17 |
| UCDX4_H3_700_30x30_1.1   |       | 700 | 0.093 | 2.88 |     |    |
| UCDX4_H3_700_30x30_1.2   | Horse | 700 | 0.108 | 2.62 | 350 | 70 |
| UCDX4_H1_700_50_1.1      |       | 700 | 0.11  | 4.06 |     |    |
| UCDX4_H1_700_50_1.2      | Horse | 700 | 0.136 | 3.85 | 561 | 37 |
| UCDX4_1505_800_30_1.1    |       | 800 | 0.063 | 3.57 |     |    |
| UCDX4_1505_800_30_1.2    | Cow   | 800 | 0.063 | 3.57 | 551 | 47 |
| UCDX4_1501_800_30_1.1    |       | 800 | 0.082 | 3.7  |     |    |
| UCDX4_1501_800_30_1.2    | Cow   | 800 | 0.081 | 3.83 | 641 | 21 |
| UCDX4_H1_800_30_1.1      |       | 800 | 0.093 | 4.17 |     |    |
| UCDX4_H1_800_30_1.2      | Horse | 800 | 0.097 | 3.92 | 868 | 57 |
| UCDX4_1505_900_30_1.1    |       | 900 | 0.023 | 4.05 |     |    |
| UCDX4_1505_900_30_1.2    | Cow   | 900 | 0.028 | 3.97 |     |    |

|                        |       |      |        |      |       |    |
|------------------------|-------|------|--------|------|-------|----|
| UCDX4_1500_900_30_1.1  | Cow   | 900  | 0.032  | 4.74 | 777   | 29 |
| UCDX4_1500_900_30_1.2  |       | 900  | 0.032  | 4.3  |       |    |
| UCDX4_H1_900_30_1.1    | Horse | 900  | 0.058  | 4.05 | 662   | 32 |
| UCDX4_H1_900_30_1.2    |       | 900  | 0.062  | 4.01 |       |    |
| UCDX4_H5_900_30_1.1    | Horse | 900  | 0.055  | 2.64 | 733   | 33 |
| UCDX4_H5_900_30_1.2    |       | 900  | 0.054  | 3.47 |       |    |
| UCDX4_1505_1000_30_1.1 | Cow   | 1000 | 0.008  | 3.48 | 827   | 37 |
| UCDX4_1505_1000_30_1.2 |       | 1000 | 0      | 3.6  |       |    |
| UCDX4_1500_1000_30_1.1 | Cow   | 1000 | 0.084  | 4.36 | 794   | 22 |
| UCDX4_1500_1000_30_1.2 |       | 1000 | 0.057  | 4.54 |       |    |
| UCDX4_1501_1000_30_1.1 | Cow   | 1000 | 0.131  | 3.26 | 96    | 3  |
| UCDX4_1501_1000_30_1.2 |       | 1000 | 0.142  | 3.13 |       |    |
| UCDX4_H0_1000_30_1.1   | Horse | 1000 | 0.041  | 3.74 | 901   | 53 |
| UCDX4_H0_1000_30_1.2   |       | 1000 | 0.04   | 3.73 |       |    |
| UCDX4_H1_1000_30_1.1   | Horse | 1000 | 0.019  | 3.82 | 809   | 50 |
| UCDX4_H1_1000_30_1.2   |       | 1000 | 0.025  | 3.75 |       |    |
| UCDX4_1505_1100_30_1.1 | Cow   | 1100 | -0.029 | 2.99 | >1000 |    |
| UCDX4_1505_1100_30_1.2 |       | 1100 | -0.03  | 2.96 |       |    |
| UCDX4_1500_1100_30_1.1 | Cow   | 1100 | 0.024  | 3.14 | 582   | 17 |
| UCDX4_1500_1100_30_1.2 |       | 1100 | 0.027  | 2.96 |       |    |
| UCDX4_H1_1100_30_1.1   | Horse | 1100 | 0.052  | 3.18 | 557   | 23 |
| UCDX4_H1_1100_30_1.2   |       | 1100 | 0.054  | 3.03 |       |    |
| UCDX4_1505_1200_30_1.1 | Cow   | 1200 | -0.066 | 2.32 | 852   | 76 |
| UCDX4_1505_1200_30_1.2 |       | 1200 | -0.029 | 2.57 |       |    |
| UCDX4_1500_1200_30_1.1 | Cow   | 1200 | 0.0441 | 2.65 | 613   | 45 |
| UCDX4_1500_1200_30_1.2 |       | 1200 | 0.0526 | 2.62 |       |    |
| UCDX4_1501_1200_30_1.1 | Cow   | 1200 | 0.132  | 2.49 | 888   | 17 |
| UCDX4_1501_1200_30_1.2 |       | 1200 | 0.145  | 2.5  |       |    |
| UCDX4_H1_1200_30_1.1   | Horse | 1200 | 0.283  | 2.46 | 637   | 61 |
| UCDX4_H1_1200_30_1.2   |       | 1200 | 0.2    | 2.58 |       |    |
| UCDX4_H2_1200_30_1.1   | Horse | 1200 | 0.101  | 2.67 | 517   | 50 |
| UCDX4_H2_1200_30_1.2   |       | 1200 | 0.107  | 2.65 |       |    |
