# Supplementary material for: Characterization of structural changes in modern and archaeological burnt bone: Implications for differential preservation bias
Source: PubMed Central journal article supplement (PMC8318310; doi:10.1371/journal.pone.0254529), 2021-07-28
Supplement: pone.0254529.s004.pdf [file pone.0254529.s004.pdf]

S3 Table: FTIR-ATR T-17 Unit 3 archaeological sample relevant peak height values.

| Sample        | Burning Stage | 1650 cm <sup>-1</sup> | 1415 cm <sup>-1</sup> | 1035 cm <sup>-1</sup> | 874 cm <sup>-1</sup> | 625 cm <sup>-1</sup> | 605 cm <sup>-1</sup> | 595 cm <sup>-1</sup> | 565 cm <sup>-1</sup> |
|---------------|---------------|-----------------------|-----------------------|-----------------------|----------------------|----------------------|----------------------|----------------------|----------------------|
| T17-779 T1.1  | Stage 0       | 0.0281                | 0.0473                | 0.1141                | 0.0442               | 0.0448               | 0.0844               | 0.075                | 0.1091               |
| T17-779 T1.2  | Stage 0       | 0.0245                | 0.0419                | 0.1004                | 0.0387               | 0.0415               | 0.0762               | 0.0655               | 0.097                |
| T17-754 T1.1  | Stage 0       | 0.0224                | 0.0369                | 0.0844                | 0.0357               | 0.0351               | 0.0672               | 0.06                 | 0.0892               |
| T17-754 T1.2  | Stage 0       | 0.023                 | 0.0336                | 0.0834                | 0.0352               | 0.0327               | 0.0657               | 0.0575               | 0.087                |
| T17-747a T1.1 | Stage 0       | 0.022                 | 0.033                 | 0.0688                | 0.0348               | 0.0325               | 0.059                | 0.0527               | 0.0743               |
| T17-747a T1.2 | Stage 0       | 0.0249                | 0.0405                | 0.0917                | 0.041                | 0.037                | 0.719                | 0.064                | 0.0919               |
| T17-757a T1.1 | Stage 0       | 0.0098                | 0.0179                | 0.0342                | 0.0189               | 0.0165               | 0.0287               | 0.0267               | 0.0377               |
| T17-757a T1.2 | Stage 0       | 0.0127                | 0.0253                | 0.0634                | 0.0279               | 0.0241               | 0.0526               | 0.0461               | 0.0681               |
| T17-496a T1.1 | Stage 0       | 0.021                 | 0.039                 | 0.105                 | 0.042                | 0.039                | 0.086                | 0.076                | 0.115                |
| T17-496a T1.2 | Stage 0       | 0.0229                | 0.0375                | 0.0849                | 0.0394               | 0.0372               | 0.0698               | 0.0629               | 0.0902               |
| T17-542 T1.1  | Stage 0       | 0.024                 | 0.046                 | 0.124                 | 0.054                | 0.044                | 0.09                 | 0.08                 | 0.12                 |
| T17-542 T1.2  | Stage 0       | 0.022                 | 0.042                 | 0.115                 | 0.047                | 0.043                | 0.093                | 0.085                | 0.124                |
| T17-496b T1.1 | Stage 1       | 0.008                 | 0.031                 | 0.111                 | 0.042                | 0.036                | 0.075                | 0.068                | 0.101                |
| T17-496b T1.2 | Stage 1       | 0.0116                | 0.0299                | 0.0938                | 0.0346               | 0.0327               | 0.0664               | 0.0589               | 0.0902               |
| T17-761 T1.1  | Stage 1       | 0.0119                | 0.0245                | 0.0682                | 0.0276               | 0.025                | 0.0549               | 0.0491               | 0.0744               |
| T17-761 T1.2  | Stage 1       | 0.116                 | 0.025                 | 0.0656                | 0.0257               | 0.0258               | 0.0552               | 0.0472               | 0.0696               |
| T17-611 T1.1  | Stage 2       | 0.211                 | 0.0349                | 0.0878                | 0.0372               | 0.0352               | 0.0719               | 0.0628               | 0.1054               |
| T17-611 T1.2  | Stage 2       | 0.0199                | 0.0368                | 0.1012                | 0.0379               | 0.0364               | 0.08                 | 0.0664               | 0.1069               |
| T17-487 T1.1  | Stage 2       | 0.0119                | 0.0265                | 0.0782                | 0.0299               | 0.0272               | 0.0593               | 0.0532               | 0.085                |
| T17-487 T1.2  | Stage 2       | 0.0097                | 0.0195                | 0.0518                | 0.0215               | 0.0209               | 0.0446               | 0.0384               | 0.0594               |
| T17-816 T1.1  | Stage 2       | 0.017                 | 0.039                 | 0.111                 | 0.044                | 0.041                | 0.081                | 0.073                | 0.109                |
| T17-816 T1.2  | Stage 2       | 0.016                 | 0.042                 | 0.117                 | 0.047                | 0.042                | 0.084                | 0.075                | 0.114                |
| T17-651 T1.1  | Stage 3       | 0.0107                | 0.0226                | 0.0805                | 0.027                | 0.027                | 0.0625               | 0.0507               | 0.0844               |
| T17-651 T1.2  | Stage 3       | 0.0102                | 0.0229                | 0.0523                | 0.0269               | 0.0275               | 0.0646               | 0.0519               | 0.0872               |
| T17-511 T1.1  | Stage 3       | 0.011                 | 0.03                  | 0.104                 | 0.029                | 0.033                | 0.063                | 0.0836               | 0.0515               |
| T17-511 T1.2  | Stage 3       | 0.0131                | 0.0268                | 0.0813                | 0.0274               | 0.0268               | 0.63                 | 0.0522               | 0.0836               |
| T17-720a T1.1 | Stage 4       | 0.018                 | 0.035                 | 0.114                 | 0.039                | 0.034                | 0.086                | 0.112                | 0.068                |
| T17-720a T1.2 | Stage 4       | 0.018                 | 0.037                 | 0.12                  | 0.038                | 0.035                | 0.089                | 0.119                | 0.07                 |
| T17-757b T1.1 | Stage 5       | 0.009                 | 0.022                 | 0.13                  | 0.025                | 0.037                | 0.088                | 0.057                | 0.126                |
| T17-757b T1.2 | Stage 5       | 0.01                  | 0.027                 | 0.152                 | 0.029                | 0.04                 | 0.1                  | 0.065                | 0.142                |
| T17-675 T1.1  | Stage 5       | 0.008                 | 0.051                 | 0.265                 | 0.047                | 0.055                | 0.15                 | 0.087                | 0.212                |
| T17-675 T1.2  | Stage 5       | 0.006                 | 0.037                 | 0.188                 | 0.035                | 0.044                | 0.119                | 0.064                | 0.156                |
| T17-580 T1.1  | Stage 6       | 0.009                 | 0.026                 | 0.25                  | 0.045                | 0.062                | 0.186                | 0.07                 | 0.25                 |
| T17-580 T1.2  | Stage 6       | 0.012                 | 0.028                 | 0.249                 | 0.045                | 0.066                | 0.173                | 0.1                  | 0.246                |
| T17-682 T1.1  | Stage 6       | 0.007                 | 0.048                 | 0.251                 | 0.049                | 0.062                | 0.15                 | 0.091                | 0.219                |
| T17-682 T1.2  | Stage 6       | 0.007                 | 0.048                 | 0.258                 | 0.054                | 0.058                | 0.147                | 0.088                | 0.216                |
| T17-637 T1.1  | Stage 6       | 0.011                 | 0.023                 | 0.152                 | 0.039                | 0.053                | 0.107                | 0.064                | 0.156                |
| T17-637 T1.2  | Stage 6       | 0.009                 | 0.02                  | 0.143                 | 0.037                | 0.051                | 0.099                | 0.059                | 0.147                |
| T17-720b T1.1 | Stage 6       | 0.023                 | 0.051                 | 0.432                 | 0.049                | 0.118                | 0.244                | 0.137                | 0.381                |
| T17-720b T1.2 | Stage 6       | 0.023                 | 0.056                 | 0.432                 | 0.053                | 0.124                | 0.252                | 0.147                | 0.392                |
