# Supplementary material for: Characterization of structural changes in modern and archaeological burnt bone: Implications for differential preservation bias
Source: PubMed Central journal article supplement (PMC8318310; doi:10.1371/journal.pone.0254529), 2021-07-28
Supplement: pone.0254529.s005.pdf [file pone.0254529.s005.pdf]

S4 Table: Calculated archaeological T-17 Unit 3 C/P and IRSF values, and bioapatite crystal size averages as measured from XRD.

| Archaeological Sample | Burning Stage | FTIR-ATR                                               |                                                                                | XRD                              |    |
|-----------------------|---------------|--------------------------------------------------------|--------------------------------------------------------------------------------|----------------------------------|----|
|                       |               | C/P<br>(1415 cm <sup>-1</sup> /1035 cm <sup>-1</sup> ) | IRSF<br>(565 cm <sup>-1</sup> +605 cm <sup>-1</sup> )/<br>590 cm <sup>-1</sup> | Crystallite size<br>Angstrom +/- |    |
| T17-779               | Stage 0       | 0.415                                                  | 2.61                                                                           | 99                               | 5  |
| T17-754               | Stage 0       | 0.42                                                   | 2.63                                                                           | 95                               | 5  |
| T17-747               | Stage 0       | 0.46                                                   | 2.54                                                                           | 96                               | 4  |
| T17-757a              | Stage 0       | 0.461                                                  | 2.55                                                                           | 83                               | 4  |
| T17-496a              | Stage 0       | 0.406                                                  | 2.59                                                                           | 107                              | 5  |
| T17-542               | Stage 0       | 0.368                                                  | 2.58                                                                           | 99                               | 4  |
| T17-496b              | Stage 1       | 0.299                                                  | 2.62                                                                           | 97                               | 6  |
| T17-761               | Stage 1       | 0.37                                                   | 2.63                                                                           | 111                              | 5  |
| T17-611               | Stage 2       | 0.38                                                   | 2.75                                                                           | 112                              | 6  |
| T17-487               | Stage 2       | 0.357                                                  | 2.71                                                                           | 119                              | 5  |
| T17-816               | Stage 2       | 0.355                                                  | 2.62                                                                           | 89                               | 3  |
| T17-651               | Stage 3       | 0.279                                                  | 2.91                                                                           | 112                              | 5  |
| T17-511               | Stage 3       | 0.329                                                  | 2.84                                                                           |                                  | /  |
| T17-720a              | Stage 4       | 0.307                                                  | 2.94                                                                           | 118                              | 5  |
| T17-757b              | Stage 5       | 0.173                                                  | 3.73                                                                           | 167                              | 6  |
| T17-675               | Stage 5       | 0.19                                                   | 4.22                                                                           | 345                              | 20 |
| T17-580               | Stage 6       | 0.108                                                  | 5.2                                                                            | 600                              | 23 |
| T17-682               | Stage 6       | 0.188                                                  | 4.08                                                                           | 366                              | 18 |
| T17-637               | Stage 6       | 0.145                                                  | 4.13                                                                           | 813                              | 39 |
| T17-720b              | Stage 6       | 0.123                                                  | 4.47                                                                           | 881                              | 26 |
